# Supplementary material for: Towards an electrowetting-based digital microfluidic platform for magnetic immunoassays
Source: Royal Society of Chemistry journal article supplement (doi:10.1039/b912646e), 2009-01-01
Supplement: b912646e.pdf [file b912646e.pdf]

## **Towards an electrowetting-based digital microfluidic platform for magnetic immunoassays**

Vincent Schaller,<sup>\*a</sup> Anke Sanz-Velasco,<sup>a</sup> Alexey Kalabukhov,<sup>a</sup> Justin F. Schneiderman,<sup>a</sup>  
Fredrik Öisjöen,<sup>a</sup> Aldo Jesorka,<sup>b</sup> Andrea Prieto Astalan,<sup>c</sup> Anatol Krozer,<sup>c</sup> Cristina Rusu,<sup>c</sup>  
Peter Enoksson,<sup>a</sup> and Dag Winkler<sup>a</sup>

### Supplementary Information

Contact angle measurements. The experimental setup is given in detail in the experimental section:

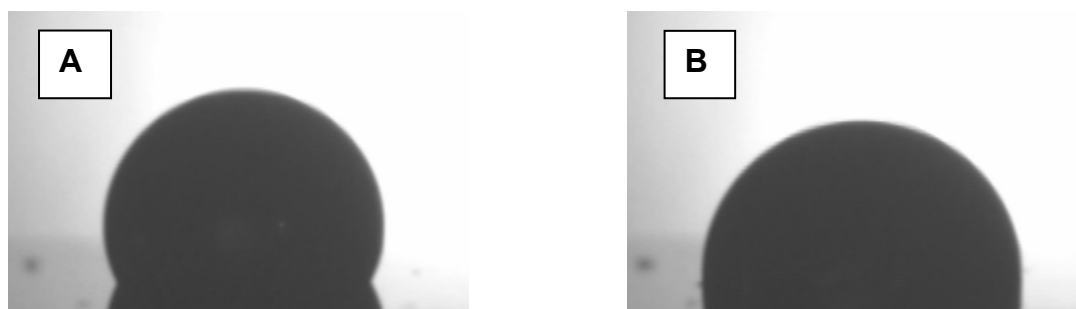

Figure S1: Experimental results of the contact angle measurements as described in the Experimental section. A: 0V, 116° B: 450V, 91.5°. Contact angles were analyzed with the contact angle measurement tool of the free image analysis software package ImageJ, with an estimated uncertainty of 0.5° due to placement of the baseline for B.

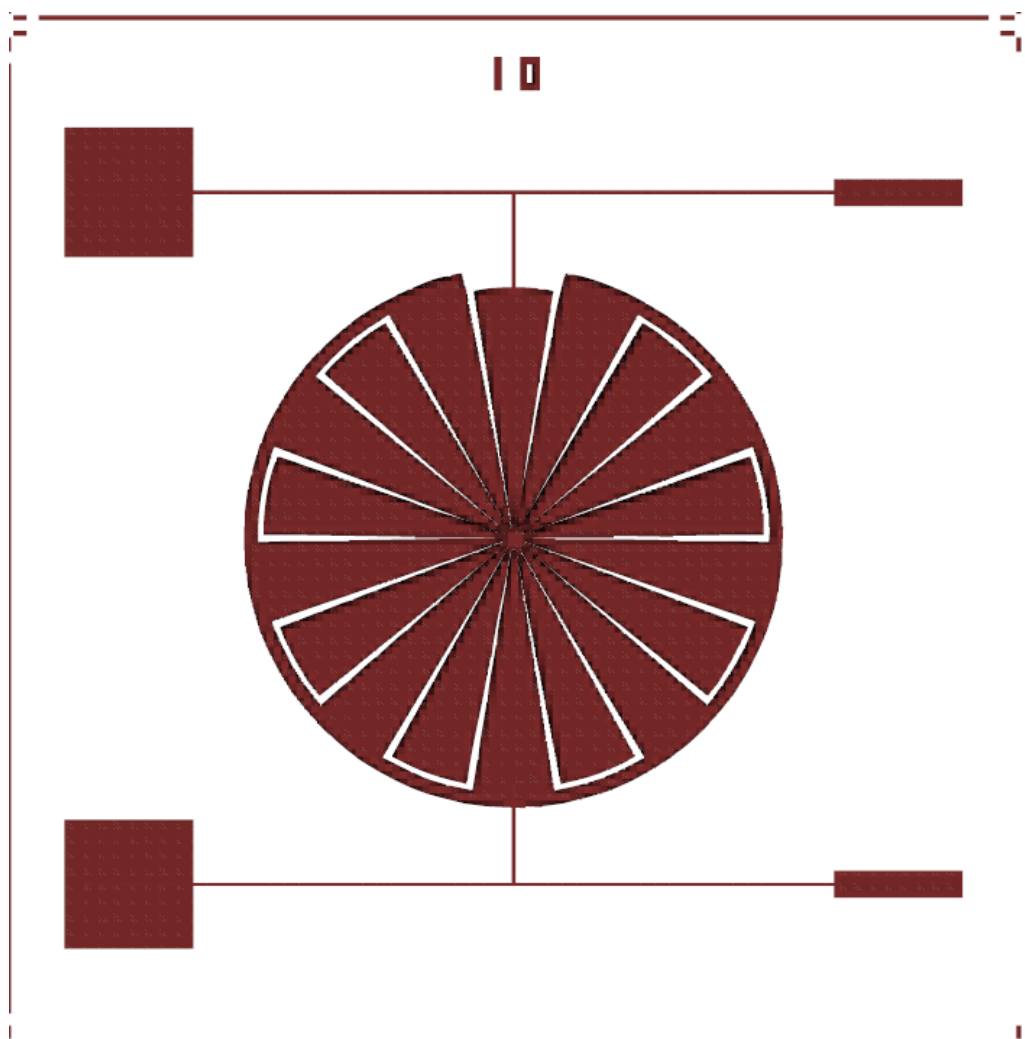

Figure S2: Layout for the microchip used for contact angle measurements.
